# Supplementary material for: Intestinal loads of extended-spectrum beta-lactamase and Carbapenemase genes in critically ill pediatric patients
Source: PubMed Central journal article supplement (PMC10188119; doi:10.3389/fcimb.2023.1180714), 2023-05-02
Supplement: DataSheet_1.pdf [file DataSheet_1.pdf]

## Intestinal Loads of Extended-Spectrum Beta-Lactamase and Carbapenemase Genes in Critical Pediatric Patients

Elias Dahdouh<sup>1\*</sup>, Emilio Cendejas-Bueno<sup>1,6</sup>, Guillermo Ruiz-Carrascoso<sup>1,6</sup>, Cristina Schüffelmann<sup>2</sup>, Fernando Lázaro-Perona<sup>1</sup>, Mercedes Castro-Martínez<sup>3</sup>, Francisco Moreno-Ramos<sup>4</sup>, Luis Escosa-García<sup>5,6</sup>, Marina Alguacil-Guillén<sup>1</sup>, Jesús Mingorance<sup>1,6</sup>

<sup>1</sup>Clinical Microbiology and Parasitology Department, Hospital Universitario La Paz, IdiPAZ, Madrid, Spain.

<sup>2</sup>Pediatric Intensive Care Unit, Hospital Universitario La Paz, Madrid, Spain.

<sup>3</sup>Preventive Medicine Department, Hospital Universitario La Paz, Madrid, Spain.

<sup>4</sup>Department of Pharmacy, Hospital Universitario La Paz, Madrid, Spain.

<sup>5</sup>Pediatric Tropical and Infectious Diseases Department, Hospital Universitario La Paz, Madrid, Spain.

<sup>f</sup>CIBERINFEC, Instituto de Salud Carlos III, Madrid, Spain

### \*Correspondence:

Elias Dahdouh; Clinical Microbiology and Parasitology Department, Hospital Universitario La Paz, IdiPAZ, Paseo de la Castellana, 261, 28046, Madrid, Spain; elie.dahdouh@gmail.com

**Supplementary Table 1.** Sensitivity and specificity of the antibiotic-selective cultures used in this study compared to the PCR results for OXA-48 and VIM-producing organisms. Numbers in parentheses ( ) indicate the range of the 95% Confidence Interval.

| PCR         | Antibiotic-selective Cultures |          |                        |          |
|-------------|-------------------------------|----------|------------------------|----------|
|             | OXA-48                        |          | VIM                    |          |
|             | Positive                      | Negative | Positive               | Negative |
| Positive    | 34                            | 32       | 48                     | 78       |
| Negative    | 5                             | 306      | 5                      | 243      |
| Sensitivity | 51.52% (38.88 – 64.01)        |          | 38.1% (29.59 – 47.17)  |          |
| Specificity | 98.39% (96.29 – 99.48)        |          | 98.98% (95.36 – 99.34) |          |

**Supplementary Table 2.** Observed genera,  $\alpha$ -diversity (Shannon method), and percent relative loads (%RLs) of the four genes tested for in this study for the 40 samples selected for *16sDNA* metagenomic sequencing. “-” implies that the sample was negative for the corresponding gene.

| Sample | Observed<br>Genera | $\alpha$ -Diversity | %RL <i>bla</i> <sub>CTX-</sub> | %RL                        | %RL                         | %RL                       |
|--------|--------------------|---------------------|--------------------------------|----------------------------|-----------------------------|---------------------------|
|        |                    |                     | M-1-Family                     | <i>bla</i> <sub>OXA1</sub> | <i>bla</i> <sub>OXA48</sub> | <i>bla</i> <sub>VIM</sub> |
| S1     | 11                 | 0.595               | -                              | -                          | -                           | 21.58                     |
| S2     | 6                  | 0.796               | 3.88                           | 3.64                       | 5.46                        | 19.31                     |
| S3     | 15                 | 2.055               | 4.21                           | 4.81                       | 4.80                        | 13.09                     |
| S4     | 11                 | 1.098               | 7.68                           | 4.26                       | 9.36                        | 0.98                      |
| S5     | 17                 | 0.856               | 6.04                           | 5.78                       | 8.56                        | 1.66                      |
| S6     | 11                 | 1.190               | 6.19                           | 17.62                      | 7.91                        | 6.34                      |
| S7     | 32                 | 2.292               | 0.00                           | 0.00                       | 0.00                        | 8.29                      |
| S8     | 11                 | 1.115               | 1.33                           | 1.69                       | 9.54                        | -                         |
| S9     | 11                 | 1.420               | 2.67                           | 3.17                       | 6.15                        | -                         |
| S10    | 7                  | 1.147               | 4.16                           | 5.10                       | -                           | 0.51                      |
| S11    | 14                 | 1.764               | 2.20                           | 2.35                       | 2.41                        | 0.05                      |
| S12    | 49                 | 2.207               | 1.04                           | 0.77                       | 1.61                        | 2.90                      |
| S13    | 6                  | 1.165               | 1.17                           | 1.51                       | 2.94                        | -                         |
| S14    | 11                 | 1.084               | 1.65                           | 1.41                       | 3.30                        | -                         |
| S15    | 13                 | 1.365               | 2.49                           | 4.06                       | 0.00                        | -                         |
| S16    | 6                  | 0.952               | 0.92                           | 1.30                       | 2.16                        | -                         |
| S17    | 15                 | 1.654               | 0.66                           | 0.61                       | 1.52                        | -                         |
| S18    | 8                  | 1.598               | 1.14                           | 1.62                       | -                           | 0.01                      |
| S19    | 9                  | 0.325               | 0.14                           | 0.18                       | 0.55                        | 0.94                      |
| S20    | 5                  | 0.872               | 0.16                           | 0.24                       | 0.54                        | -                         |
| S21    | 23                 | 1.712               | 0.29                           | 0.37                       | -                           | -                         |
| S22    | 17                 | 1.691               | 0.04                           | 0.06                       | 0.05                        | -                         |
| S23    | 12                 | 1.524               | 0.00                           | 0.00                       | 0.00                        | -                         |
| S24    | 40                 | 2.231               | 0.05                           | 0.09                       | 0.10                        | -                         |
| S25    | 7                  | 0.489               | 0.15                           | 0.15                       | 0.16                        | -                         |
| S26    | 10                 | 1.282               | 0.03                           | 0.03                       | 0.09                        | -                         |
| S27    | 12                 | 0.713               | 0.03                           | 0.03                       | 0.09                        | -                         |
| S28    | 13                 | 1.327               | 0.001                          | 0.002                      | 0.001                       | -                         |
| S29    | 3                  | 0.788               | 0.001                          | -                          | 0.003                       | 0.001                     |
| S30    | 17                 | 1.336               | -                              | -                          | -                           | -                         |
| S31    | 16                 | 1.882               | -                              | -                          | -                           | -                         |
| S32    | 30                 | 2.326               | -                              | -                          | -                           | -                         |
| S33    | 37                 | 2.259               | -                              | -                          | -                           | -                         |
| S34    | 33                 | 1.537               | -                              | -                          | -                           | -                         |
| S35    | 34                 | 2.010               | -                              | -                          | -                           | -                         |
| S36    | 19                 | 1.455               | -                              | -                          | -                           | -                         |
| S37    | 18                 | 2.139               | -                              | -                          | -                           | -                         |
| S38    | 43                 | 0.133               | -                              | -                          | -                           | -                         |
| S39    | 28                 | 0.409               | -                              | -                          | -                           | -                         |
| S40    | 3                  | 0.695               | -                              | -                          | -                           | -                         |
